# Supplementary material
Source: MDPI journal article supplement (https://www.mdpi.com/2571-9408/6/9/331)

Lithotype A  
limestone

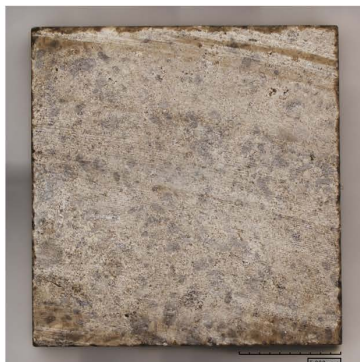

30 days  
28 °C  
90 % RH

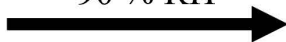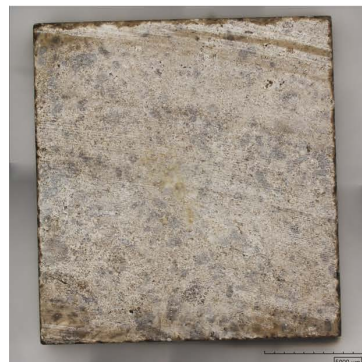

Lithotype B  
limestone

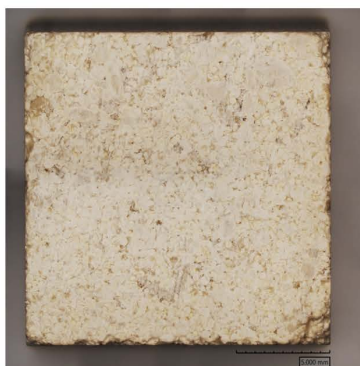

30 days  
28 °C  
90 % RH

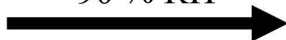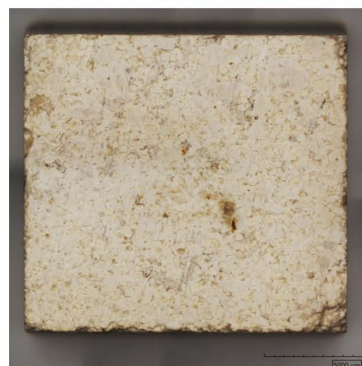

Lithotype C  
marble

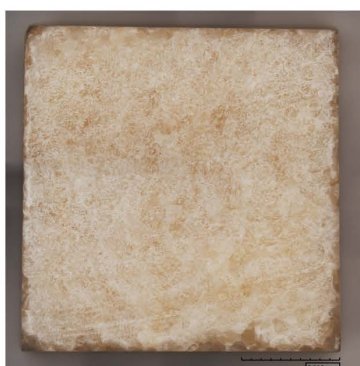

30 days  
28 °C  
90 % RH

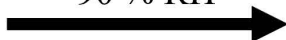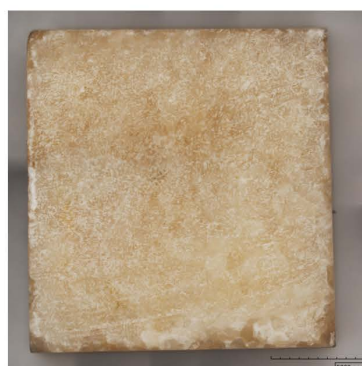

Lithotype D  
marble

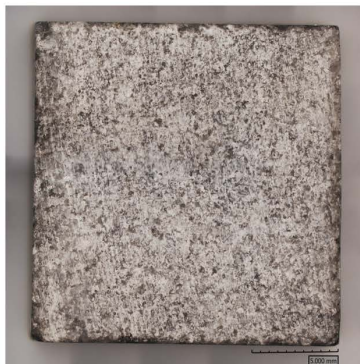

30 days  
28 °C  
90 % RH

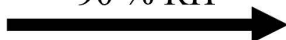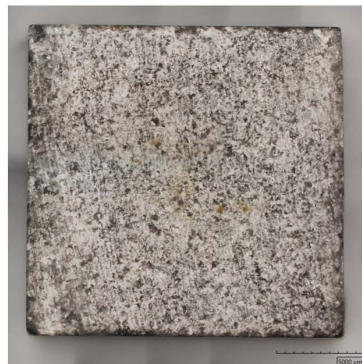

Lithotype E  
slate

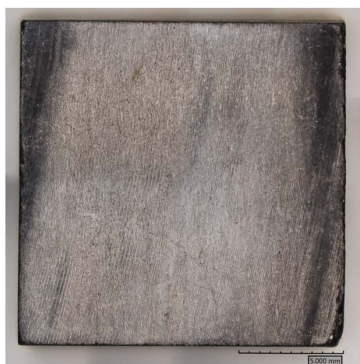

30 days  
28 °C  
90 % RH

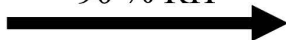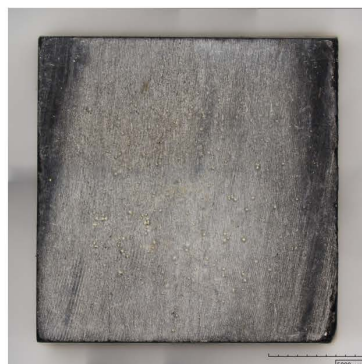

Supplement: s1 [file s1]
